# Supplementary material
Source: PubMed Central journal article supplement (PMC1266140)
Supplement: pnas_0507723102_2.pdf [file pnas_0507723102_2.pdf]

**Table 1. Salinity and ion composition of different water types**

|                                                        | Type                | TDS      | SAR                     | Ca                       | Mg    | Na   | K      | HCO <sub>3</sub> | SO <sub>4</sub> | Cl   | pH  | Ref. |
|--------------------------------------------------------|---------------------|----------|-------------------------|--------------------------|-------|------|--------|------------------|-----------------|------|-----|------|
| Units                                                  |                     | mg/liter | (mmol/l) <sup>0.5</sup> | mmol <sub>c</sub> /liter |       |      |        |                  |                 |      |     |      |
| Delta-Mendota Canal (DMC)                              | Na/Cl               | 319      | 2.3                     | 1.1                      | 1.25  | 2.5  | –      | 1.5              | 1.1             | 2.2  | 8.0 | 1    |
| California Aqueduct                                    | Na/Cl               | 308      | 2.4                     | 1.0                      | 1.23  | 2.5  | –      | 0.8              | 1.1             | 2.9  | 8.0 | 2    |
| Groundwater (sub-Corcoran)                             | Na/SO <sub>4</sub>  | 1,085    | 16.8                    | 1.25                     | 0.12  | 13.9 | –      | 2.5              | 10.5            | 2.3  | –   | 3    |
| Rainfall                                               | Na/Cl               | 1.6      | 0.4                     | 0.002                    | 0.003 | 0.02 | 0.0005 | 0.005            | 0.009           | 0.01 | 6.1 | 4    |
| San Joaquin River floodplain deposits north of Mendota | Na/HCO <sub>3</sub> | 326      | 4.1                     | 0.8                      | 0.5   | 3.3  | 0.0    | 2.4              | 0.5             | 1.6  | –   | 3    |
| Kings River floodplain deposits south of Mendota       | Na/HCO <sub>3</sub> | 414      | 5.7                     | 0.9                      | 0.14  | 4.1  | 0.0    | 4.3              | 0.5             | 0.3  | –   | 3    |
| Panoche Creek                                          | Na/SO <sub>4</sub>  | 4,092    | 8.0                     | 14.9                     | 15.2  | 30.8 | 0.0    | 6.3              | 46.0            | 8.7  | –   | 5    |

$$SAR = \frac{Na}{\sqrt{\frac{Ca + Mg}{2}}}$$

1. Tanji, K. K., Biggar, J. W., Miller, R. J. & Pruitt, W. O. (1980) Water Science and Engineering Paper 4020 (U.S. Environmental Protection Agency).
2. California Department of Water Resources (2003).
3. Davis, G. H. & Coplen, T. B. (1989) Geol. Soc. Am. Special Paper 234 (Geol. Soc. Am., Boulder, CO).
4. National Atmospheric Deposition Program (2003).
5. Davis, G. H. & Poland, J. F. (1957) Water Supply Paper 1360-G (U.S. Geol. Survey, Sacramento, CA).
