# Supplementary material
Source: PubMed Central journal article supplement (PMC1266140)
Supplement: pnas_0507723102_3.pdf [file pnas_0507723102_3.pdf]

**Table 2. Hydrologic and salt transport parameter values**

| Parameter                        | Description                                 | Units | Value     | Comment or Reference                      |
|----------------------------------|---------------------------------------------|-------|-----------|-------------------------------------------|
| <b>Root water uptake</b>         |                                             |       |           |                                           |
| $f_{ET}$                         | ET correction coefficient                   | –     | 0.82      | Calibrated (ref. 1)                       |
| $C_3$                            | Water stress fitting parameter              | –     | 12.0      | Ref. 2                                    |
| $\psi(\theta_{wp})$              | Pressure at wilting point                   | m     | –150      | Ref. 3                                    |
| $\psi(\theta_{fc})$              | Pressure at field capacity                  | m     | –5        | Ref. 3                                    |
| $\psi(\theta_o)$                 | Pressure at oxic limit                      | m     | –0.25     | Ref. 3                                    |
| $\psi(\theta_{an})$              | Pressure at anoxic limit                    | m     | 0         | Ref. 3                                    |
| $L$                              | Root-zone depth                             | m     | 2.0       | Ref. 3                                    |
| $\delta$                         | Root distribution parameter                 | –     | 0.5       | Linear root distribution                  |
| <b>Irrigation</b>                |                                             |       |           |                                           |
| $IE_{shallow}$                   | Maximum irrigation efficiency               | –     | 1.0       | Calibrated and adjusted                   |
| $IE_{deep}$                      | Minimum irrigation efficiency               | –     | 0.67      | Calibrated (ref. 1)                       |
| <b>Drainage</b>                  |                                             |       |           |                                           |
| $d_e$                            | Drain depth                                 | m     | 2.46/3.10 | Grasslands/Westlands (calibrated, ref. 1) |
| $C_d$                            | Drain conductance                           | 1/yr  | 0.15/0.06 | Grasslands/Westlands (calibrated, ref. 1) |
| <b>Soil hydraulic properties</b> |                                             |       |           |                                           |
| $K_{Corc}$                       | Hydraulic conductivity of the Corcoran clay | m/yr  | 0.02      | Calibrated and adjusted                   |
| $K_F$                            | $K$ of the fine fraction                    | m/yr  | 0.38      | Calibrated (ref. 1)                       |
| $f_{Kc}$                         | Scaling factor for $K$ of coarse fraction   | –     | 1.0       | Ref. 4                                    |
| $n$                              | Porosity                                    | –     | 0.5       | Calibrated and adjusted                   |
| $S_{wr}$                         | Residual saturation                         | –     | 0.1       | Calibrated and adjusted                   |
| $\alpha$                         | van Genuchten parameter                     | 1/m   | 0.3       | Calibrated and adjusted                   |

| Parameter                   | Description                                 | Units                          | Value | Comment or Reference      |
|-----------------------------|---------------------------------------------|--------------------------------|-------|---------------------------|
| $\beta$                     | van Genuchten parameter                     | –                              | 2.0   | Calibrated and adjusted   |
| $b$                         | Brooks-Corey parameter                      | –                              | 5.0   | Calibrated and adjusted   |
| <b>Diffusion–dispersion</b> |                                             |                                |       |                           |
| $\alpha_L$                  | Longitudinal dispersivity                   | m                              | 0.8   | Calibrated and adjusted   |
| $\alpha_T$                  | Transverse dispersivity                     | m                              | 0.08  | Ref. 5                    |
| $D_0$                       | Diffusion coefficient                       | m <sup>2</sup> /yr             | 0.03  | Ref. 6                    |
| <b>Chemical reactions</b>   |                                             |                                |       |                           |
| $CEC_c$                     | Cation exchange capacity of coarse fraction | mmol <sub>c</sub> /k<br>g soil | 50    | Ref. 7                    |
| $CEC_f$                     | Cation exchange capacity of fine fraction   | mmol <sub>c</sub> /k<br>g soil | 350   | Ref. 7                    |
| $K_{Ca-Mg}$                 | Ca/Mg selectivity coefficient               | –                              | 0.63  | Ref. 8                    |
| $K_{Ca-Na}$                 | Ca/Na selectivity coefficient               | –                              | 6.3   | Ref. 8                    |
| $K_{Ca-K}$                  | Ca/K selectivity coefficient                | –                              | 0.36  | Ref. 8                    |
| $Temp$                      | Soil temperature                            | °C                             | 20    |                           |
| $CO_2$                      | Soil air CO <sub>2</sub> content            | vol%                           | 0.03  | Atmospheric concentration |

1. Schoups, G., Hopmans, J. W., Young, C. A., Vrugt, J. A. & Wallender, W. W., *J. Hydrol.*, in press.
2. Kristensen, K. J. & Jensen, S. E. (1975) *Nord. Hydrol.* **6**, 170–188.
3. van Dam, J. C. et al. (1997) *Theory of SWAP* (Alterra Green World Research, Wageningen, The Netherlands), Version 2.0.
4. Belitz, K., Phillips, S. P. & Gronberg, J. M. (1993) Water Supply Paper 2396 (U.S. Geol. Survey, Sacramento, CA).
5. Zheng, C. & Bennett, G. D. (2002) *Applied Contaminant Transport Modeling* (Wiley, New York).
6. Fetter, C. W. (1999) *Contaminant Hydrogeology* (Macmillan, New York).
7. Doneen, L. D. (1967) *Hilgardia* **38**, 285–300.

8. Robbins, W., Wagenet, R. J. & Jurinak, J. J. (1980) *Soil Sci. Soc. Am. J.*, **44**, 1191–1194.
